# Supplementary material for: Allosteric regulation of 3CL protease of SARS-CoV-2 and SARS-CoV observed in the crystal structure ensemble
Source: bioRxiv or medRxiv preprint supplement (doi:10.1101/2021.08.29.458083), 2021-10-22
Supplement: Supplementary file [file media-2.pdf]

| 6yf    |       |                  |        | A82                       | AZD6482                                   |   |                        | A82 is on the molecular surface, which is not contained in the major binding sites.                                                                       | 0.880  | -0.551 | -1.436 | 0.332  | -5.541  | 1410-144N | 1 | 1 | 1 | 1 | 1      | 1     | 7.731  | 11.584  | 6.473 |        |        |        |           |           |           |        | 0.001   | -8.7    | 5.308 |        |        |        |        |         |        |         |       |
|--------|-------|------------------|--------|---------------------------|-------------------------------------------|---|------------------------|-----------------------------------------------------------------------------------------------------------------------------------------------------------|--------|--------|--------|--------|---------|-----------|---|---|---|---|--------|-------|--------|---------|-------|--------|--------|--------|-----------|-----------|-----------|--------|---------|---------|-------|--------|--------|--------|--------|---------|--------|---------|-------|
| 6z2e   |       |                  |        | Q5T                       | isole-PEG(4)-Abu-Tle-Lsu-Glu-vinylsulfone | P |                        | Q5T contain a long polyether chain.                                                                                                                       | 0.859  | 0.838  | 0.051  | -1.018 | -2.176  | 1410-144N | 1 | 1 | 1 | 1 | 1      | 1     | 7.427  | 10.983  | 6.321 |        |        |        |           |           |           | 0.001  | -4.654  | 5.671   |       |        |        |        |        |         |        |         |       |
| 6zrt   |       |                  |        | PRD_002448                | Teloprevir                                | P | 55.76*                 |                                                                                                                                                           | 0.776  | 0.330  | -0.340 | -1.444 | 1.028   | 1410-144N | 1 | 1 | 1 | 1 | 1      | 1     | 7.567  | 11.482  | 6.483 |        |        |        |           |           |           | 0      | -2.954  | 5.783   |       |        |        |        |        |         |        |         |       |
| 6zru   |       |                  |        | PRD_002382                | Boceprevir                                | P | 1.59*                  |                                                                                                                                                           | 0.852  | 1.447  | -0.563 | -1.332 | -11.195 | 1410-144N | 1 | 1 | 1 | 1 | 1      | 1     | 7.611  | 11.594  | 6.37  |        |        |        |           |           |           | -0.001 | -14.568 | 5.172   |       |        |        |        |        |         |        |         |       |
| 7aku   |       |                  |        | HN2                       | Calpeptin                                 | P | 0.072*                 |                                                                                                                                                           | 0.643  | -0.113 | -1.265 | -2.456 | -9.968  | 1410-144N | 1 | 1 | 1 | 1 | 1      | 1     | 7.552  | 11.144  | 6.165 |        |        |        |           |           |           | -0.001 | -10.285 | 5.499   |       |        |        |        |        |         |        |         |       |
| 7b83   |       |                  |        | PK8                       | pyrithione zinc                           |   |                        | PK8 covalently binds both C145 and H41 at Zn.                                                                                                             | 1.020  | -0.909 | -1.713 | -0.256 | -6.838  | 1410-144N | 1 | 1 | 1 | 1 | 1      | 1     | 7.756  | 11.595  | 6.297 |        |        |        |           |           |           | 0      | -10.158 | 5.175   |       |        |        |        |        |         |        |         |       |
| 7bqy   |       |                  |        | PRD_002214                | N3                                        | P | 16.77*                 | Ligand binding is improved over 6lu7.                                                                                                                     | 0.798  | 1.130  | -1.121 | -0.430 | -3.718  | 1410-144N | 1 | 1 | 1 | 1 | 1      | 1     | 7.378  | 11.151  | 6.5   |        |        |        |           |           |           | 0      | -8.561  | 5.435   |       |        |        |        |        |         |        |         |       |
| 7brp   | G     | G of A,B         |        | PRD_002382                | Boceprevir                                | P | 8.0*                   |                                                                                                                                                           | 1.102  | 3.712  | -0.151 | -1.539 | -12.159 | 1410-144N | 1 | 1 | 1 | 1 | 1      | 1     | 7.650  | 11.712  | 6.408 | 1.301  | 3.165  | 0.697  | -0.988    | -14.419   | 1410-144N | 1      | 1       | 1       | 1     | 1      | 1      | 7.611  | 11.724 | 6.458   | 1.075  | -14.237 | 5.518 |
| 7buy   |       |                  |        | JRY                       | Carmofur                                  |   | 1.82*<br>24.30         | The fluorouracil moiety of carmofur is eliminated to make JRY upon binding.                                                                               | 0.441  | 0.202  | 0.481  | 1.601  | -7.960  | 1410-144N | 1 | 1 | 1 | 1 | 1      | 1     | 7.560  | 11.219  | 6.501 |        |        |        |           |           |           | 0.002  | -11.529 | 5.270   |       |        |        |        |        |         |        |         |       |
| 7cis   |       |                  |        | PRD_002382                | Boceprevir                                | P | 8.0*                   |                                                                                                                                                           | 0.689  | 0.558  | 0.273  | -1.000 | -4.263  | 1410-144N | 1 | 1 | 1 | 1 | 1      | 1     | 7.666  | 11.444  | 6.598 |        |        |        |           |           |           | 0.001  | -6.71   | 5.476   |       |        |        |        |        |         |        |         |       |
| 7c6u   |       |                  |        | K36                       | GC376                                     | P | 0.15*                  | Sulfoxide is replaced by Sg of C145.                                                                                                                      | 1.050  | 0.649  | -0.039 | -1.400 | -10.703 | 1410-144N | 1 | 1 | 1 | 1 | 1      | 1     | 7.297  | 11.162  | 6.203 |        |        |        |           |           |           | 0      | -13.249 | 5.552   |       |        |        |        |        |         |        |         |       |
| 7c7p   |       |                  |        | PRD_002448                | Teloprevir                                | P |                        | Almost a half of PRD_002448 is missing in chain B, and named FK3, while it is fully modeled in chain A.                                                   | 0.510  | 0.706  | -0.844 | -0.428 | 3.052   | 1410-144N | 1 | 1 | 1 | 1 | 1      | 1     | 7.770  | 11.324  | 6.887 | 0.746  | 0.404  |        | 1.973     | -3.453    | 1410-144N | 1      | 1       | 1       | 1     | 1      | 1      | 7.646  | 11.384 | 6.51    | -0.455 | -2.592  | 5.356 |
| 7c8b   |       |                  |        | PRD_002352                | 2-VAD (DMb)-FMK                           | P |                        |                                                                                                                                                           | 0.524  | 0.064  | -0.754 | 2.114  | -5.474  | 1410-144N | 1 | 1 | 1 | 1 | 1      | 1     | 7.850  | 11.617  | 6.745 |        |        |        |           |           |           |        | -0.001  | -8.732  | 5.313 |        |        |        |        |         |        |         |       |
| 7c8r   |       |                  |        | TG3                       | TG-0203770                                | P |                        |                                                                                                                                                           | 0.587  | 2.254  | 0.015  | 0.779  | 0.790   | 1410-144N | 1 | 1 | 1 | 1 | 1      | 1     | 7.410  | 11.093  | 6.349 |        |        |        |           |           |           | 0      | -5.886  | 5.752   |       |        |        |        |        |         |        |         |       |
| 7c8t   |       |                  |        | NOL                       | TG-0205221                                | P |                        |                                                                                                                                                           | 0.895  | 1.518  | -1.047 | 1.433  | -1.767  | 1410-144N | 1 | 1 | 1 | 1 | 1      | 1     | 7.556  | 11.113  | 6.295 |        |        |        |           |           |           | 0      | -6.932  | 5.607   |       |        |        |        |        |         |        |         |       |
| 7c8u   |       |                  | 5G     | K36                       | GC376                                     | P |                        | Sulfoxide is replaced by Sg of C145.                                                                                                                      | 0.811  | -0.524 | -0.553 | -2.401 | -5.604  | 1410-144N | 1 | 1 | 0 | 1 | 1      | 1     | 7.323  | 11.298  |       |        |        |        |           |           |           | 0      | -6.932  | 5.607   |       |        |        |        |        |         |        |         |       |
| 7c8t   |       |                  | 27 res | K36                       | GC376                                     | P | 0.643*<br>0.881        | Sulfoxide is replaced by Sg of C145.                                                                                                                      | 0.896  | 0.602  | 0.816  | -2.104 | -4.228  | 1410-144N | 1 | 1 | 0 | 1 | 1      | 1     | 7.460  | 10.963  |       | 0.774  | 0.615  | 0.606  | -1.354    | 2.620     | 1         | 1      | 0       | 1       | 1     | 7.542  | 11.217 |        | -3.417 | 0.837   | 5.545  |         |       |
| 7com   |       |                  |        | PRD_002382                | Boceprevir                                | P |                        |                                                                                                                                                           | 0.674  | 0.488  | -0.462 | 1.660  | 2.253   | 1410-144N | 1 | 1 | 1 | 1 | 1      | 1     | 7.854  | 11.507  | 6.907 | 0.819  | 0.191  |        | 1.942     | -3.242    | 1410-144N | 1      | 1       | 1       | 1     | 1      | 7.797  | 11.516 | 6.851  | -0.504  | -2.223 | 5.446   |       |
| 7c9d   |       |                  |        | GKf                       | HNZ-1                                     |   |                        |                                                                                                                                                           | 0.214  | 1.000  |        | 1.389  | -4.238  | 1410-144N | 1 | 1 | 1 | 1 | 1      | 1     | 8.053  | 11.962  | 6.732 |        |        |        |           |           |           |        | -0.001  | -8.227  | 5.137 |        |        |        |        |         |        |         |       |
| 7d1m   | G     | G of A, G5S of B |        | K36                       | GC376                                     | P | 0.15*                  | Sulfoxide is replaced by Sg of C145. Highly heterogeneous crystal environment of P 1 2 1.                                                                 | 0.833  | 0.791  | 0.592  | -2.880 | -12.259 | 1410-144N | 1 | 1 | 0 | 1 | 1      | 1     | 7.362  | 11.082  | 8.549 | 0.349  | 0.554  | 0.029  | -2.161    | 31.074    | 1410-144N | 1      | 1       | 0       | 1     | 1      | 7.454  | 11.396 |        | -31.017 | 13.809 | 6.972   |       |
| 7d1o   |       |                  |        | NNA                       | Narlaprevir                               | P | 16.11*                 |                                                                                                                                                           | 1.196  | 0.667  | 0.236  | -1.369 | -16.306 | 1410-144N | 1 | 1 | 1 | 1 | 1      | 1     | 7.506  | 11.658  | 6.491 |        |        |        |           |           |           |        | -0.002  | -13.997 | 5.564 |        |        |        |        |         |        |         |       |
| 7d3i   |       |                  |        | GQU                       | Mi-23                                     | P | 0.0076*                | GQU is hydrogen bonded with S1 of chain B.                                                                                                                | 1.280  | 2.294  | -1.533 | 0.015  | -8.860  | 1410-144N | 1 | 1 | 1 | 1 | 1      | 1     | 7.479  | 11.172  | 6.335 |        |        |        |           |           |           |        | -0.001  | -9.409  | 5.493 |        |        |        |        |         |        |         |       |
| 7jkv   | G     | G of A           |        | V7G                       | Sh                                        | P | 0.0176 4.2             | Highly heterogeneous crystal environment of P 1 2 1.                                                                                                      | 0.248  | 1.751  | 0.531  | -3.052 | -10.714 | 1410-144N | 1 | 1 | 0 | 1 | 1      | 1     | 7.506  | 11.311  | 6.666 | -0.012 | 1.283  | 0.479  | -3.065    | 38.703    | 1410-144N | 1      | 1       | 1       | 1     | 1      | 7.729  | 11.566 | 9.737  | -33.707 | 18.045 | 7.974   |       |
| 7joy_B | C145A |                  |        | C-term of another chain B |                                           | P |                        | Chain B binds a symmetrically related C-term, while chain A are in free state. C145A makes the protein inactive.                                          |        |        |        |        |         |           |   |   |   |   |        |       |        |         | 0.844 | 0.369  | -0.369 | 0.808  | 8.088     | 1410-144N | 1         | 1      | 1       | 1       | 1     | 7.298  | 10.675 | 7.975  | -1.691 | 5.914   | 5.965  |         |       |
| 7ju7   |       |                  |        | G65                       | Masitinib                                 |   | 2.6, 2.5*<br>2.1, 3.2* |                                                                                                                                                           | 0.455  | 0.378  | -0.314 | 1.819  | -7.308  | 1410-144N | 1 | 1 | 1 | 1 | 1      | 1     | 7.784  | 11.370  | 6.596 |        |        |        |           |           |           | 0      | -11.037 | 5.484   |       |        |        |        |        |         |        |         |       |
| 7jyc   |       |                  |        | NNA                       | Narlaprevir                               | P |                        |                                                                                                                                                           | 1.214  | 0.992  | -1.365 | -2.237 | -13.017 | 1410-144N | 1 | 1 | 1 | 1 | 1      | 1     | 7.528  | 11.504  | 6.252 |        |        |        |           |           |           | 0      | -15.669 | 5.428   |       |        |        |        |        |         |        |         |       |
| 7k40   |       |                  |        | PRD_002382                | Boceprevir                                | P |                        |                                                                                                                                                           | 0.872  | 2.636  | -0.879 | -1.686 | -12.475 | 1410-144N | 1 | 1 | 1 | 1 | 1      | 1     | 7.539  | 11.449  | 6.151 |        |        |        |           |           |           | 0      | -17.424 | 5.131   |       |        |        |        |        |         |        |         |       |
| 7k6d   |       |                  |        | PRD_002448                | Teloprevir                                | P |                        | Acoustic droplet ejection. Cryo-protected.                                                                                                                | 0.713  | 0.494  | -0.368 | -1.482 | 0.183   | 1410-144N | 1 | 1 | 1 | 1 | 1      | 1     | 7.673  | 11.389  | 6.485 |        |        |        |           |           |           | 0      | -4.091  | 6.131   |       |        |        |        |        |         |        |         |       |
| 7k6e   |       |                  |        | PRD_002448                | Teloprevir                                | P |                        | Acoustic droplet ejection. Direct vitrification.                                                                                                          | 0.599  | 0.531  | -0.223 | -1.323 | 1.348   | 1410-144N | 1 | 1 | 1 | 1 | 1      | 1     | 7.618  | 11.448  | 6.517 |        |        |        |           |           |           | 0      | -3.807  | 6.040   |       |        |        |        |        |         |        |         |       |
| 7khp_B |       |                  |        | C-term of another chain B |                                           | P |                        | Chain B binds a symmetrically related C-term, while chain A are in free state. Q306 forms a covalent bond with C145 to form the acyl-enzyme intermediate. |        |        |        |        |         |           |   |   |   |   |        |       |        | 0.836   | 0.939 | -0.173 | 1.437  | 9.127  | 1410-144N | 1         | 1         | 1      | 1       | 1       | 7.579 | 11.183 | 7.356  | -3.358 | 5.057  | 5.710   |        |         |       |
| 7lp    | GAM   | GAM of B         |        | XY4                       | FZ Entry Library Q05 Fragment             |   |                        | A single XY4 is at the protomer interface between the two N-fingers, and located outside the major binding sites.                                         | -1.680 | -0.364 | 0.029  | 1.703  | 8.856   | 1         | 0 | 0 | 1 | 0 | 13.658 | 8.634 | 10.043 | -10.861 | 1.054 | 2.326  | 2.327  | 10.531 | 1390-142N | 0         | 0         | 0      | 0       | 0       | 9.802 | 13.847 | 7.971  | -3.084 | 17.418 | 9.847   |        |         |       |
| 7nev   |       |                  |        | PRD_000216                | Leupeptin                                 | P |                        |                                                                                                                                                           | -1.119 | 0.767  | -0.509 | 0.180  | -14.576 | 1410-144N | 1 | 1 | 1 | 1 | 1      | 1     | 7.569  | 11.364  | 6.375 |        |        |        |           |           |           | 0      | -15.051 | 5.156   |       |        |        |        |        |         |        |         |       |

PDB data are of the version of 10/25/2020. Lightgray colored cells indicate either chain B of symmetric dimer or ligand-unbound chain. Distances are in Å.  
 \*Peptide or peptide-mimic ligand is defined when a ligand contains more than or equal to two peptide moieties. However, it is admitted that a carbonyl group is replaced by alcohol, and that Cα is in a part of an aromatic group.  
 †The residues with underline indicate that they are of the native sequencing.  
 ‡Data from the PanDDA analysis (15Series) and the entry having swapping, 3lwm, were not used in this study.  
 ††Hbs: 1 for formed and 0 for not formed. HBs are intra-protomer hydrogen bonds except HB 140-1.

























Supporting data S7 Summary of entries of MERS-CoV 3CL protease

| ligand       | protein |          |                          |                             | ligand      |                            |                                       |                                                                                     | comments                                                                            | Chain A                                             |                                   |                                   |                               |                                   |                                 |                                              | Chain B                       |                                              |                                                     |                                   |                                   |                               |                                   |                                 |                               |                                             |                                             |                               |
|--------------|---------|----------|--------------------------|-----------------------------|-------------|----------------------------|---------------------------------------|-------------------------------------------------------------------------------------|-------------------------------------------------------------------------------------|-----------------------------------------------------|-----------------------------------|-----------------------------------|-------------------------------|-----------------------------------|---------------------------------|----------------------------------------------|-------------------------------|----------------------------------------------|-----------------------------------------------------|-----------------------------------|-----------------------------------|-------------------------------|-----------------------------------|---------------------------------|-------------------------------|---------------------------------------------|---------------------------------------------|-------------------------------|
|              | PDB ID  | mutation | residues added to N-term | missing N-terminal residues | name in PDB | name by authors            | peptide or peptide mimic <sup>§</sup> | K <sub>i</sub> , IC <sub>50</sub> <sup>*</sup> , EC <sub>50</sub> <sup>*</sup> (μM) |                                                                                     | C-loop conformation                                 |                                   |                                   |                               |                                   |                                 |                                              | HB 2-217 (2-214) <sup>#</sup> | C-loop conformation                          |                                                     |                                   |                                   |                               |                                   |                                 | distance between two 285 Ca's |                                             |                                             |                               |
|              |         |          |                          |                             |             |                            |                                       |                                                                                     |                                                                                     | main-chain HB within 141-147 (138-145) <sup>#</sup> | HB 141-175 (138-172) <sup>#</sup> | HB 142-129 (139-126) <sup>#</sup> | HB 143-1 (140-1) <sup>#</sup> | HB 144-121 (141-118) <sup>#</sup> | HB 146-28 (143-28) <sup>#</sup> | distance 168Ca-143C β (165-140) <sup>#</sup> |                               | distance 168Ca-144C β (165-141) <sup>#</sup> | main-chain HB within 141-147 (138-145) <sup>#</sup> | HB 141-175 (138-172) <sup>#</sup> | HB 142-129 (139-126) <sup>#</sup> | HB 143-1 (140-1) <sup>#</sup> | HB 144-121 (141-118) <sup>#</sup> | HB 146-28 (143-28) <sup>#</sup> |                               | distance 168Ca-143Cβ (165-140) <sup>#</sup> | distance 168Ca-144Cβ (165-141) <sup>#</sup> | HB 2-217 (2-214) <sup>#</sup> |
| ligand bound | 4rsp    |          |                          |                             | PRD_002174  | 6                          | p                                     | 3.6                                                                                 | C145 is CSO and does not bind the ligand                                            | 144O-147N                                           | 1                                 | 0                                 | 1                             | 1                                 | 1                               | 7.414                                        | 10.957                        | 1                                            |                                                     |                                   |                                   |                               |                                   |                                 |                               |                                             | 6.123                                       |                               |
|              | 4wme_AB | C148A    |                          |                             |             | C-term of another molecule | p                                     |                                                                                     | chain BD are ligand-free. A(C) bind C-term of C(A)                                  | 144O-147N                                           | 1                                 | 0                                 | 1                             | 1                                 | 1                               | 7.485                                        | 10.867                        | 1                                            | 144O-147N                                           | 1                                 | 0                                 | 1                             | 1                                 | 1                               | 7.556                         | 10.982                                      | 1                                           | 6.153                         |
|              | 4wmf_A  | C148A    |                          |                             |             | C-term of another molecule | p                                     |                                                                                     | chain BC are ligand free A binds C-term of C                                        | 144O-147N                                           | 1                                 | 0                                 | 1                             | 1                                 | 1                               | 7.294                                        | 10.603                        | 1                                            |                                                     |                                   |                                   |                               |                                   |                                 |                               |                                             | 5.956                                       |                               |
|              | 4ylu_AB |          |                          |                             | R30         | 11                         |                                       | >100*                                                                               |                                                                                     | 144O-147N                                           | 1                                 | 0                                 | 1                             | 1                                 | 1                               | 7.5                                          | 11.073                        | 1                                            | 144O-147N                                           | 1                                 | 0                                 | 1                             | 1                                 | 1                               | 7.549                         | 11.173                                      | 1                                           | 7.174                         |
|              | 4ylu_CD |          |                          |                             | R30         | 11                         |                                       | >100*                                                                               |                                                                                     | 144O-147N                                           | 1                                 | 0                                 | 1                             | 1                                 | 1                               | 7.589                                        | 11.175                        | 1                                            | 144O-147N                                           | 1                                 | 0                                 | 1                             | 1                                 | 1                               | 7.475                         | 10.935                                      | 1                                           | 6.132                         |
|              | 5wkj    |          | MH6                      | MH5                         | K36,B1S     | GC376                      | p                                     |                                                                                     | K36 and B1S are stereoisomers, and not distinguished                                | 144O-147N                                           | 1                                 | 0                                 | 0 <sup>&amp;</sup>            | 1                                 | 1                               | 7.225                                        | 10.955                        | 0                                            |                                                     |                                   |                                   |                               |                                   |                                 |                               |                                             |                                             | 6.762                         |
|              | 5wkk    |          | MH6                      | MH4                         | B3G,AW4     | GC813                      | p                                     |                                                                                     | B3G and AW4 are stereoisomers, and not distinguished                                | 144O-147N                                           | 1                                 | 0                                 | 0 <sup>&amp;</sup>            | 1                                 | 1                               | 7.278                                        | 10.744                        | 0                                            |                                                     |                                   |                                   |                               |                                   |                                 |                               |                                             |                                             | 6.603                         |
|              | 5wkl    |          | MH6                      | MH4                         | B3J, AVY    | 10c                        | p                                     | 0.7*                                                                                | B3J and AVY are stereoisomers, and not distinguished                                | 144O-147N                                           | 1                                 | 0                                 | 0 <sup>&amp;</sup>            | 1                                 | 1                               | 7.332                                        | 10.946                        | 0                                            |                                                     |                                   |                                   |                               |                                   |                                 |                               |                                             |                                             | 7.26                          |
|              | 5wkm    |          | MH6                      | MH4                         | B6Y, N02    | 10e                        |                                       | 7.5*                                                                                | B6Y and N02 are stereoisomers, and not distinguished                                | 144O-147N                                           | 1                                 | 0                                 | 0 <sup>&amp;</sup>            | 1                                 | 1                               | 7.3                                          | 11.024                        | 0                                            |                                                     |                                   |                                   |                               |                                   |                                 |                               |                                             |                                             | 7.636                         |
|              | 6vgy    |          | MH6                      | MH4 of A,B                  | QZJ         | 6b                         |                                       | 0.33*                                                                               |                                                                                     | 144O-147N                                           | 0 <sup>§</sup>                    | 0                                 | 0 <sup>&amp;</sup>            | 1                                 | 1                               | 7.298                                        | 11.006                        | 0                                            | 144O-147N                                           | 0 <sup>§</sup>                    | 0                                 | 0 <sup>&amp;</sup>            | 1                                 | 1                               | 7.356                         | 11.099                                      | 0                                           | 9.495                         |
|              | 6vgz    |          | MH6                      | MH4 of A,B                  | QZG         | 6d                         |                                       | 0.41*                                                                               |                                                                                     | 144O-147N                                           | 0 <sup>§</sup>                    | 0                                 | 0 <sup>&amp;</sup>            | 1                                 | 1                               | 7.3                                          | 11.061                        | 0                                            | 144O-147N                                           | 0 <sup>§</sup>                    | 0                                 | 0 <sup>&amp;</sup>            | 1                                 | 1                               | 7.348                         | 11.181                                      | 0                                           | 9.624                         |
|              | 6vh0    |          | MH6                      | MH4 of A,B                  | QZD         | 6g                         |                                       | 0.12*                                                                               |                                                                                     | 144O-147N                                           | 0 <sup>§</sup>                    | 0                                 | 0 <sup>&amp;</sup>            | 1                                 | 1                               | 7.193                                        | 10.862                        | 0                                            | 144O-147N                                           | 0 <sup>§</sup>                    | 0                                 | 0 <sup>&amp;</sup>            | 1                                 | 1                               | 7.352                         | 11.144                                      | 0                                           | 9.289                         |
|              | 6vh1    |          | MH6                      | MH4 of A,B                  | QZ7         | 6h                         |                                       | 0.07*                                                                               |                                                                                     | 144O-147N                                           | 0 <sup>§</sup>                    | 0                                 | 0 <sup>&amp;</sup>            | 1                                 | 1                               | 7.284                                        | 11.074                        | 0                                            | 144O-147N                                           | 0 <sup>§</sup>                    | 0                                 | 0 <sup>&amp;</sup>            | 1                                 | 1                               | 7.287                         | 11.067                                      | 0                                           | 9.842                         |
|              | 6vh2    |          | MH6                      | MH4 of A,B                  | QZ4         | 7i                         |                                       | 1.9*                                                                                |                                                                                     | 144O-147N                                           | 0 <sup>§</sup>                    | 0                                 | 0 <sup>&amp;</sup>            | 1                                 | 1                               | 7.317                                        | 11.066                        | 0                                            | 144O-147N                                           | 0 <sup>§</sup>                    | 0                                 | 0 <sup>&amp;</sup>            | 1                                 | 1                               | 7.434                         | 11.123                                      | 0                                           | 9.758                         |
| 6vh3         |         | MH6      | MH4 of A, MH6 of B       | QYS                         | 7j          | p                          | 0.1*                                  |                                                                                     | 144O-147N                                                                           | 0 <sup>§</sup>                                      | 0                                 | 0 <sup>&amp;</sup>                | 1                             | 1                                 | 7.486                           | 11.369                                       | 0                             | 144O-147N                                    | 0 <sup>§</sup>                                      | 0                                 | 0                                 | 1                             | 1                                 | 7.32                            | 11.132                        | 0                                           | 10.103                                      |                               |
| ligand free  | 4wmd_AB | C148A    |                          |                             |             |                            |                                       |                                                                                     |                                                                                     | 144O-147N                                           | 1                                 | 0                                 | 1                             | 1                                 | 1                               | 7.238                                        | 10.959                        | 0                                            | 144O-147N                                           | 1                                 | 0                                 | 1                             | 1                                 | 1                               | 7.277                         | 10.989                                      | 1                                           | 6.293                         |
|              | 4wmd_C  | C148A    |                          |                             |             |                            |                                       |                                                                                     |                                                                                     | 144O-147N                                           | 1                                 | 0                                 | 1                             | 1                                 | 1                               | 7.215                                        | 10.962                        | 1                                            |                                                     |                                   |                                   |                               |                                   |                                 |                               |                                             | 6.116                                       |                               |
|              | 4wme_CD | C148A    |                          |                             |             |                            |                                       |                                                                                     | chain AD are ligand bound                                                           | 144O-147N                                           | 1                                 | 0                                 | 1                             | 1                                 | 1                               | 7.426                                        | 10.866                        | 1                                            | 144O-147N                                           | 1                                 | 0                                 | 1                             | 1                                 | 1                               | 7.4                           | 10.817                                      | 1                                           | 6.191                         |
|              | 4wmf_B  | C148A    |                          |                             |             |                            |                                       |                                                                                     | chain A is ligand bound                                                             |                                                     |                                   |                                   |                               |                                   |                                 |                                              |                               |                                              | 144O-147N                                           | 1                                 | 0                                 | 1                             | 1                                 | 1                               | 7.215                         | 10.755                                      | 1                                           | 5.956                         |
|              | 4wmf_C  | C148A    |                          | 1-10 of C                   |             |                            |                                       |                                                                                     | chain C is monomeric. Its core is maintained, but domain III rotates about 180 deg. | 144O-147N                                           | 0                                 | 0                                 | 0                             | 1                                 | 1                               | 8.071                                        | 11.316                        | 0                                            |                                                     |                                   |                                   |                               |                                   |                                 |                               |                                             |                                             |                               |
| 5c3n         |         |          |                          |                             |             |                            |                                       |                                                                                     | 144O-147N                                                                           | 0                                                   | 0                                 | 1                                 | 1                             | 1                                 | 7.87                            | 11.145                                       | 0                             | 144O-147N                                    | 0                                                   | 0                                 | 1                                 | 1                             | 1                                 | 7.571                           | 11.064                        | 1                                           | 6.581                                       |                               |

# The residue numbers in parenthesis is the corresponding number for SARS-CoV-2 3CL<sup>pro</sup>.

§ HB 141-175 is replaced by HB 140-175.

&amp; HB 143-1 is replaced by HB 142-2.

**Table S8** Ligand binding at protein residues of MERS-CoV 3CL protease.

|                     |       | interfa<br>ce | H-loop |      |      | C-loop |      |      |      |      |      | E-loop |      |      |      |      |      | Linker |      |      |      |      |      | Ligand<br>interactions |      |
|---------------------|-------|---------------|--------|------|------|--------|------|------|------|------|------|--------|------|------|------|------|------|--------|------|------|------|------|------|------------------------|------|
| entry               | chain | M25           | H41    | L49  | Y54  | F143   | L144 | C145 | G146 | S147 | C148 | H166   | Q167 | M168 | E169 | L170 | A171 | H175   | D190 | K191 | Q192 | V193 | H194 | Q195                   |      |
| 4rsp                | A     | 0             | 1      | 0    | 0    | 11     | 1    | 1    | 10   | 1    | 21   | 11     | 11   | 1    | 11   | 0    | 0    | 1      | 1    | 10   | 11   | 11   | 1    | 11                     | CEL  |
| 4wme_AB             | A     | 0             | 11     | 0    | 0    | 11     | 1    | 1    | 11   | 1    | 11   | 11     | 11   | 1    | 11   | 1    | 0    | 1      | 1    | 1    | 11   | 11   | 1    | 1                      | CEL  |
| 4wme_CD             | D     | 0             | 11     | 0    | 0    | 11     | 1    | 0    | 11   | 0    | 11   | 11     | 11   | 1    | 11   | 1    | 0    | 1      | 1    | 1    | 1    | 1    | 1    | 0                      | CEL  |
| 4wmf_AB             | A     | 0             | 11     | 0    | 0    | 11     | 1    | 1    | 11   | 1    | 11   | 11     | 11   | 1    | 11   | 1    | 1    | 1      | 1    | 1    | 11   | 1    | 11   | 0                      | CEL  |
| 4ylu_AB             | A     | 1             | 1      | 1    | 1    | 1      | 1    | 1    | 0    | 0    | 11   | 11     | 0    | 1    | 11   | 0    | 0    | 0      | 1    | 1    | 1    | 0    | 0    | 0                      | EH   |
| 4ylu_AB             | B     | 1             | 1      | 1    | 0    | 1      | 1    | 1    | 0    | 0    | 1    | 11     | 0    | 1    | 11   | 0    | 0    | 0      | 1    | 1    | 1    | 0    | 0    | 0                      | E    |
| 4ylu_CD             | C     | 1             | 1      | 1    | 0    | 1      | 1    | 1    | 0    | 0    | 1    | 11     | 0    | 1    | 11   | 0    | 0    | 0      | 1    | 1    | 1    | 0    | 0    | 0                      | EH   |
| 4ylu_CD             | D     | 1             | 1      | 1    | 1    | 1      | 1    | 1    | 0    | 0    | 11   | 11     | 0    | 1    | 11   | 0    | 0    | 0      | 1    | 1    | 1    | 0    | 0    | 0                      | EH   |
| 5wkj                | A     | 0             | 11     | 1    | 0    | 11     | 1    | 1    | 0    | 0    | 21   | 11     | 11   | 1    | 11   | 0    | 0    | 1      | 1    | 0    | 11   | 0    | 0    | 0                      | CE   |
| 5wkk                | A     | 0             | 1      | 1    | 0    | 11     | 1    | 1    | 1    | 1    | 21   | 11     | 11   | 1    | 11   | 0    | 1    | 1      | 1    | 0    | 11   | 1    | 1    | 0                      | CEL  |
| 5wkl                | A     | 0             | 11     | 1    | 1    | 11     | 1    | 1    | 0    | 1    | 21   | 11     | 11   | 1    | 11   | 0    | 0    | 1      | 1    | 0    | 11   | 0    | 0    | 0                      | CEH  |
| 5wkm                | A     | 0             | 0      | 0    | 0    | 11     | 0    | 1    | 1    | 1    | 21   | 11     | 11   | 1    | 11   | 0    | 0    | 1      | 1    | 1    | 0    | 0    | 0    | 0                      | CE   |
| 6vgy                | A     | 0             | 1      | 1    | 0    | 1      | 1    | 1    | 1    | 1    | 21   | 11     | 11   | 1    | 11   | 0    | 1    | 1      | 1    | 0    | 11   | 0    | 0    | 0                      | CE   |
| 6vgy                | B     | 0             | 0      | 1    | 0    | 11     | 0    | 0    | 1    | 1    | 21   | 11     | 11   | 1    | 11   | 1    | 1    | 1      | 1    | 1    | 11   | 0    | 0    | 0                      | CEL  |
| 6vgz                | A     | 0             | 1      | 0    | 0    | 11     | 0    | 1    | 1    | 0    | 21   | 11     | 11   | 1    | 11   | 0    | 1    | 1      | 1    | 1    | 11   | 0    | 0    | 0                      | CEL  |
| 6vgz                | B     | 0             | 0      | 0    | 0    | 11     | 0    | 0    | 1    | 0    | 21   | 11     | 11   | 1    | 11   | 0    | 0    | 1      | 1    | 1    | 11   | 0    | 0    | 0                      | CEL  |
| 6vh0                | A     | 0             | 1      | 0    | 0    | 11     | 1    | 1    | 1    | 1    | 21   | 11     | 11   | 1    | 11   | 0    | 0    | 1      | 1    | 1    | 11   | 0    | 0    | 0                      | CEL  |
| 6vh0                | B     | 0             | 0      | 1    | 0    | 11     | 0    | 0    | 1    | 1    | 21   | 11     | 11   | 1    | 11   | 0    | 0    | 1      | 1    | 1    | 11   | 0    | 0    | 0                      | CEL  |
| 6vh1                | A     | 0             | 1      | 1    | 0    | 11     | 0    | 0    | 1    | 1    | 21   | 11     | 11   | 1    | 11   | 0    | 0    | 1      | 0    | 0    | 11   | 0    | 0    | 0                      | CE   |
| 6vh1                | B     | 0             | 0      | 1    | 0    | 11     | 0    | 0    | 1    | 1    | 21   | 11     | 11   | 1    | 11   | 0    | 0    | 1      | 1    | 0    | 11   | 0    | 0    | 0                      | CE   |
| 6vh2                | A     | 0             | 1      | 1    | 1    | 11     | 1    | 1    | 1    | 1    | 21   | 11     | 10   | 1    | 11   | 0    | 0    | 1      | 1    | 1    | 11   | 1    | 0    | 11                     | CELH |
| 6vh2                | B     | 0             | 1      | 1    | 1    | 11     | 0    | 1    | 1    | 1    | 21   | 11     | 11   | 1    | 11   | 0    | 0    | 1      | 1    | 1    | 11   | 0    | 0    | 0                      | CELH |
| 6vh3                | A     | 0             | 1      | 0    | 0    | 11     | 0    | 0    | 1    | 1    | 21   | 11     | 11   | 1    | 11   | 1    | 1    | 1      | 1    | 1    | 11   | 1    | 0    | 11                     | CEL  |
| 6vh3                | B     | 0             | 1      | 0    | 0    | 11     | 0    | 0    | 1    | 0    | 21   | 11     | 11   | 1    | 11   | 0    | 1    | 1      | 1    | 0    | 11   | 1    | 1    | 0                      | CEL  |
| MERS-CoV            |       | M25           | H41    | L49  | Y54  | F143   | L144 | C145 | G146 | S147 | C148 | H166   | Q167 | M168 | E169 | L170 | A171 | H175   | D190 | K191 | Q192 | V193 | H194 | Q195                   |      |
| ratio of occurrence |       | 0.17          | 0.79   | 0.58 | 0.21 | 1.00   | 0.58 | 0.67 | 0.75 | 0.63 | 1.00 | 1.00   | 0.83 | 1.00 | 1.00 | 0.21 | 0.29 | 0.83   | 0.96 | 0.71 | 0.96 | 0.33 | 0.25 | 0.17                   |      |
| SARS-CoV-2          |       | T25           | H41    | M49  | Y54  | F140   | L141 | N142 | G143 | S144 | C145 | H163   | H164 | M165 | E166 | L167 | P168 | H172   | D187 | R188 | Q189 | T190 | A191 | Q192                   |      |
| ratio of occurrence |       | 0.25          | 0.94   | 0.66 | 0.18 | 0.72   | 0.65 | 0.80 | 0.83 | 0.49 | 0.99 | 0.74   | 0.88 | 0.89 | 0.90 | 0.22 | 0.47 | 0.56   | 0.68 | 0.54 | 0.80 | 0.56 | 0.38 | 0.43                   |      |

The contacts occurring in only one chain, L27, C44, S46 and A193, are not listed in the table.
